# Supplementary material
Source: PubMed Central journal article supplement (PMC3093946)
Supplement: supp_00378.2010_legend.pdf [file supp_00378.2010_legend.pdf]

**Supplemental Figure 1.** Cell counts for HMGB1 staining on mouse diaphragms (n=6) following 2 week daily intraperitoneal injection of PBS or LPS. Counts were taken from the peritoneal surface and the mean number of HMGB1+ cells per hpf are indicated. Bars represent mean  $\pm$  SD.
